# Supplementary material for: Novel ultra-high-temperature zero-thermal quenching plant-protecting type blue-green dual-emission KAl11O17:Eu2+,Mn2+ phosphors for urban ecological lighting
Source: Royal Society of Chemistry journal article supplement (doi:10.1039/d1tc04890b), 2022-01-01
Supplement: d1tc04890b1.pdf [file d1tc04890b1.pdf]

## Electronic Supporting Information

### **A novel ultra-high temperature zero-thermal quenching plant-protected type blue-green dual-emission $KAl_{11}O_{17}:Eu^{2+}, Mn^{2+}$ phosphors for urban ecological lighting**

Haifeng Zhu,<sup>†a</sup> Xu Huang,<sup>†a</sup> Yanan Li,<sup>a</sup> Yalan She,<sup>a</sup> Jing Wang,<sup>a,b,c</sup> Wai-Yeung Wong,<sup>a,d</sup>  
Min Liu,<sup>e</sup> Wei Li,<sup>a</sup> Zhi Zhou<sup>\*,a,b</sup> and Mao Xia<sup>\*,a,b</sup>

a.School of Chemistry and Materials Science, Hunan Agricultural University, Changsha 410128, PR China. E-mail: [zhouzhi@hunan.edu.cn](mailto:zhouzhi@hunan.edu.cn)

b.Hunan Optical Agriculture Engineering Technology Research Center, Changsha 410128, PR China. E-mail: [xiamao2014@163.com](mailto:xiamao2014@163.com)

c.State Key Laboratory of Optoelectronic Materials and Technologies, School of Chemistry, Sun Yat-Sen University, Guangzhou 510275, PR China.

d.Department of Applied Biology and Chemical Technology, The Hong Kong Polytechnic University, Hung Hom, Hong Kong, PR China

e.School of Physical and Electronics, Central South University, Changsha 410083, China

#### **\*Corresponding authors:**

Prof. Zhi Zhou

**Phone number:** (+86)-13975160917; **E-mail:** [zhouzhi@hunan.edu.cn](mailto:zhouzhi@hunan.edu.cn)

Prof. Mao Xia

**Phone number:** (+86)-15802612087; **E-mail:** [xiamao2019@hunau.edu.cn](mailto:xiamao2019@hunau.edu.cn)

<sup>†</sup>These authors contributed equally to this work.

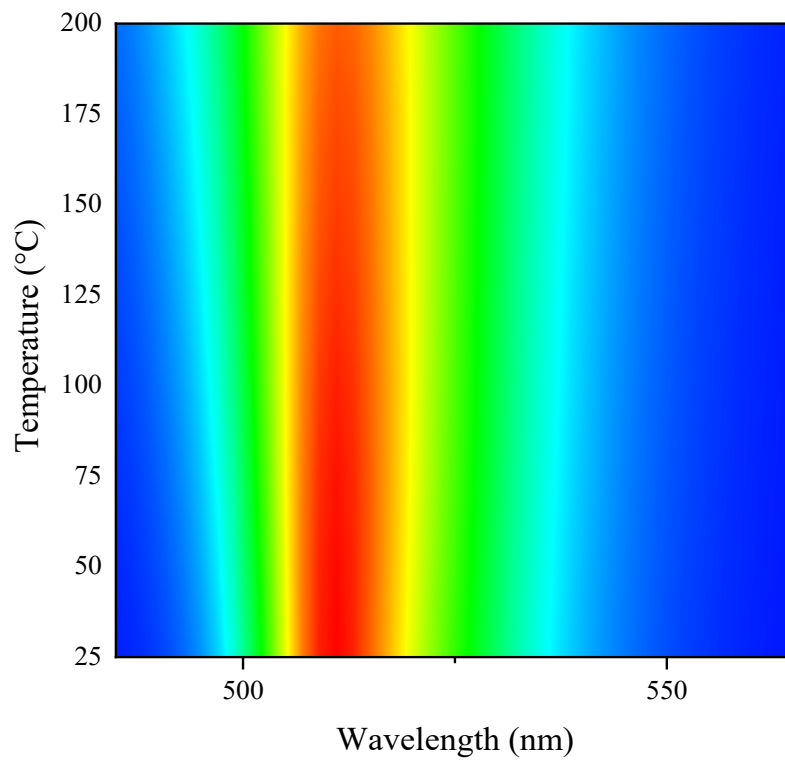

**Fig.S1** Temperature dependence of  $\text{KAl}_{11}\text{O}_{17}:0.24\text{Mn}^{2+}$  phosphors.

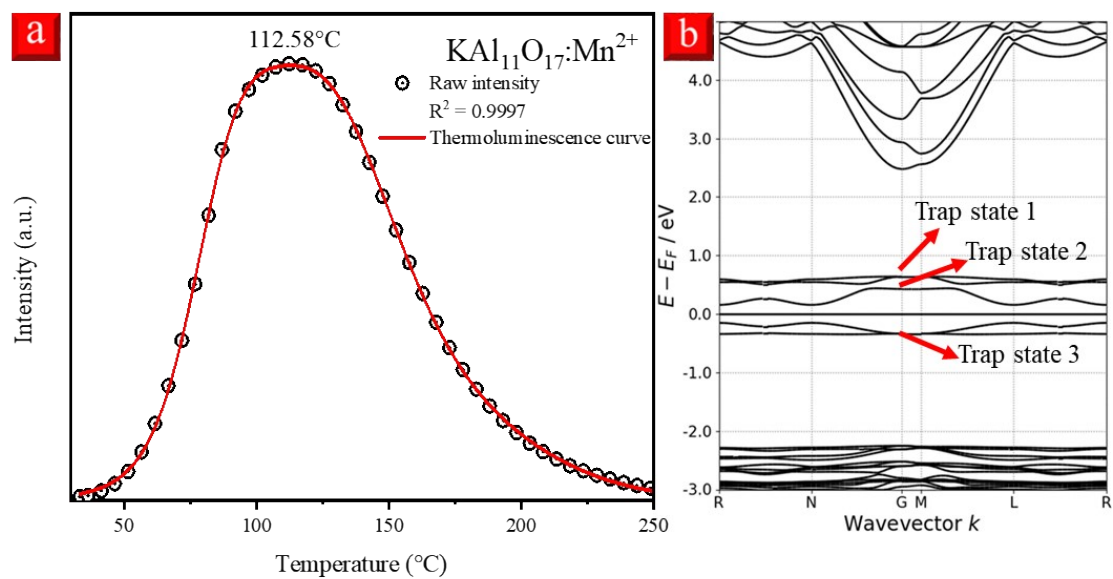

**Fig.S2** (a) Thermoluminescence curves of  $\text{KAl}_{11}\text{O}_{17}:\text{0.24Mn}^{2+}$  phosphors; (b) electronic band structure near the Fermi energy level for  $\text{KAl}_{11}\text{O}_{17}:\text{0.24Mn}^{2+}$ .

**Table S1** Comparison of quantum efficiency between this work and some reported blue-green dual-emission phosphors.

| Phosphor composition                                                                 | IQE (%) | EQE (%) | Ref.      |
|--------------------------------------------------------------------------------------|---------|---------|-----------|
| $\text{Mg}_3\text{Ca}_3(\text{PO}_4)_4:\text{Eu}^{2+}, \text{Mn}^{2+}$               | 83      | ---     | 1         |
| $\text{NaBa}_{1-x}\text{Sr}_x\text{B}_9\text{O}_{15}:\text{Ce}^{3+}, \text{Mn}^{2+}$ | ---     | 45.8    | 2         |
| $\text{Sr}_5\text{MgLa}_2(\text{BO}_3)_6:\text{Ce}^{3+}, \text{Mn}^{2+}$             | ---     | 53      | 3         |
| $\gamma\text{-AlON}:x\text{Ce}^{3+}, y\text{Mn}^{2+}$                                | 60.2    | 49.8    | 4         |
| $\text{Ca}_2\text{GdHf}_2\text{Al}_3\text{O}_{12}:\text{Ce}^{3+}, \text{Tb}^{3+}$    | 82.7    | 60.6    | 5         |
| $\text{NaBaBO}_3:\text{Ce}^{3+}, \text{Tb}^{3+}$                                     | 57      | 37      | 6         |
| $\text{Ba}_3\text{Y}(\text{PO}_4)_3:\text{Eu}^{2+}, \text{Mn}^{2+}$                  | 23      | ---     | 7         |
| $\text{KSrLu}(\text{PO}_4)_2:\text{Ce}^{3+}, \text{Tb}^{3+}, \text{Mn}^{2+}$         | 61      | 55      | 8         |
| $\text{Ca}_2\text{LuHf}_2\text{Al}_3\text{O}_{12}:\text{Ce}^{3+}, \text{Tb}^{3+}$    | 77.1    | 55.8    | 9         |
| $\text{BaAl}_{11}\text{O}_{16}\text{N}:\text{Eu}^{2+}, \text{Mn}^{2+}$               | 41.5    | ---     | 10        |
| $\text{KAl}_{11}\text{O}_{17}:\text{Mn}^{2+}, \text{Eu}^{2+}$                        | 84.18   | 56.86   | This work |

**Table S2** Comparison of zero-TQ performance between these work and other advanced phosphors.

| Phosphor composition                                                          | Ex (nm) | Em (nm) | zero-TQ* (%) | Optimal temperature (°C) | Ref.      |
|-------------------------------------------------------------------------------|---------|---------|--------------|--------------------------|-----------|
| $\text{Na}_{3-2x}\text{Sc}_2(\text{PO}_4)_3:\text{Eu}^{2+}$                   | 370     | 453     | 100          | 250                      | 11        |
| $\text{K}_2\text{BaCa}(\text{PO}_4)_2:\text{Eu}^{2+}$                         | 350     | 460     | 100          | 275                      | 12        |
| $\text{BaMgSi}_4\text{O}_{10}:\text{Eu}^{2+}$                                 | 360     | 464     | 100          | 227                      | 13        |
| $\beta\text{-Ca}_2\text{P}_2\text{O}_7:\text{Bi}^{2+}$                        | 250     | 680     | 100          | 227                      | 14        |
| $\text{Cs}_2\text{MP}_2\text{O}_7:\text{Eu}^{2+}$                             | 360     | 548     | 120          | 175                      | 15        |
| $\text{Mg}_3\text{Y}_2\text{Ge}_3\text{O}_{12}:\text{Eu}^{3+},\text{Mn}^{4+}$ | 420     | 660     | 120          | 250                      | 16        |
| $\text{Sr}_3\text{SiO}_5:\text{Eu}^{2+}$                                      | 468     | 573     | 100          | 120                      | 17        |
| $\text{Sr}_8\text{ZnSc}(\text{PO}_4)_7:\text{Tb}^{3+}$                        | 370     | 546     | 100          | 225                      | 18        |
| $\text{Sr}_4\text{Gd}_3\text{Na}_3(\text{PO}_4)_6\text{F}_2:\text{Tb}^{3+}$   | 277     | 546     | 100          | 300                      | 19        |
| $\text{Ca}_2\text{InSbO}_6:\text{Sm}^{3+}$                                    | 407     | 600     | 100          | 200                      | 20        |
| $\text{BaMgP}_2\text{O}_7:\text{Eu}^{2+},\text{Mn}^{2+}$                      | 300     | 620     | 100          | 227                      | 21        |
| $\text{CsMoO}_2\text{F}_3:\text{Mn}^{4+}$                                     | 450     | 633     | 129          | 150                      | 22        |
| $\text{Li}_2\text{CaSi}_2\text{N}_4:\text{Ce}^{3+}$                           | 431     | 507     | 100          | 200                      | 23        |
| $\text{LaAlO}_3:\text{Mn}^{4+}$                                               | 340     | 734     | 103          | 150                      | 24        |
| $\text{LaSc}_3(\text{BO}_3)_4:\text{Eu}^{3+}$                                 | 280     | 617     | 102          | 275                      | 25        |
| $\text{Ba}_2\text{ZnGe}_2\text{O}_7:\text{Bi}^{3+}$                           | 320     | 500     | 114          | 150                      | 26        |
| $\text{KAl}_{11}\text{O}_{17}:\text{Eu}^{2+}$                                 | 365     | 450     | 162.16       | 300                      | This work |
| $\text{KAl}_{11}\text{O}_{17}:\text{Eu}^{2+},\text{Mn}^{2+}$                  | 365     | 450,510 | 120.97       | 150                      | This work |

\*The zero-TQ refers to the retention rate of luminescence intensity at optimal temperature relative to normal temperature.

**Table S3** The defect formation energies of  $\text{KAl}_{11}\text{O}_{17}:\text{Mn}^{2+}$ ,  $\text{KAl}_{11}\text{O}_{17}:\text{Eu}^{2+}$  and  $\text{KAl}_{11}\text{O}_{17}:\text{Eu}^{2+}, \text{Mn}^{2+}$  phosphor calculated by using the DFT-PBE method.

| Trap Types                                                           | $E$ (eV) | $E-E_f$ (eV)      |
|----------------------------------------------------------------------|----------|-------------------|
| $\text{KAl}_{11}\text{O}_{17}:\text{Mn}^{2+}$ sample                 |          | $E_f^* = 5.71$ eV |
| Trap state 1                                                         | 6.34     | 0.63              |
| Trap state 2                                                         | 6.13     | 0.42              |
| Trap state 3                                                         | 5.37     | -0.34             |
| $\text{KAl}_{11}\text{O}_{17}:\text{Eu}^{2+}$ sample                 |          | $E_f = 8.14$ eV   |
| Trap state 1                                                         | 8.19     | 0.05              |
| Trap state 2                                                         | 7.90     | -0.24             |
| Trap state 3                                                         | 7.20     | -0.94             |
| $\text{KAl}_{11}\text{O}_{17}:\text{Eu}^{2+}, \text{Mn}^{2+}$ sample |          | $E_f = 6.52$ eV   |
| Trap state 1                                                         | 6.68     | 0.16              |
| Trap state 2                                                         | 6.47     | -0.05             |
| Trap state 3                                                         | 6.28     | -0.24             |
| Trap state 4                                                         | 5.81     | -0.71             |

\* $E_f$ : Fermi level

**Table S4** The pc-LED made by “KAl<sub>11</sub>O<sub>17</sub>:Mn<sup>2+</sup>, Eu<sup>2+</sup> + K<sub>2</sub>TiF<sub>6</sub>:Mn<sup>4+</sup>” and data under different current conditions.

| <b>Current(mA)</b> | <b>CIE x</b> | <b>CIE y</b> | <b>CCT(K)</b> |
|--------------------|--------------|--------------|---------------|
| <b>20</b>          | 0.2972       | 0.3370       | 7276          |
| <b>60</b>          | 0.2980       | 0.3355       | 7252          |
| <b>100</b>         | 0.3128       | 0.3383       | 6432          |
| <b>140</b>         | 0.3239       | 0.3361       | 5897          |
| <b>180</b>         | 0.3240       | 0.3361       | 5895          |
| <b>220</b>         | 0.3239       | 0.3264       | 5927          |

## Notes and references

- 1 X.G. Zhang, J.H. Song, C.Y. Zhou, *Mater. Sci. Eng. B*, 2014, 187, 26-31.
- 2 Q. Bao, Z. Wang, J. Sun, *Dalton. T.*, 2018, 47, 13913-13925.
- 3 M. Muller, S. Fischer, T. Justel, *RSC Adv.* 2015, 5, 67979-67988.
- 4 J.Y. Si, L. Wang, L.H. Liu, *J. Mater. Chem. C*, 2019, 7, 733-743.
- 5 X.H. Huang, J. Liang, S. Rtimi, *Chem. Eng. J.*, 2021, 405, 126950-126962.
- 6 M.L. Xia, W.R. Zhao, J.Y. Zhong, *J. Lumin.*, 2020, 220, 116957-116963.
- 7 N. Guo, C. Jia, J. Li, *RSC Adv.*, 2015, 5, 46517-46524.
- 8 S.A. Zhang, W.X. Lin, Q.F. Li, *Spectrochim. Acta. A*, 2019, 219, 110-120.
- 9 N. Ma, W. Li, B. Devakumar, *J. Colloid. Interf. Sci.*, 2021, 601, 365-377.
- 10 J.S. Huo, Q.J. Zhu, S.Z. Li, *J. Alloys. Compd.*, 2019, 787, 96-103.
- 11 Y.H. Kim, P. Arunkumar, B.Y. Kim, *Nat. Mater.*, 2017, 16, 543-550.
- 12 J.W. Qiao, L.X. Ning, M.S. Molokeev, *J. Am. Chem. Soc.*, 2018, 140, 9730-9736.
- 13 J.Y. Zhong, Y. Zhuo, S. Hariyani, *Inorg. Chem.*, 2020, 59, 13427-13434.
- 14 L. Li, J. Cao, B. Viana, *Inorg. Chem.*, 2017, 56, 6499-6506.
- 15 Y. Wei, Z. Gao, S. Liu, *Adv. Opt. Mater.*, 2020, 8, 1901859-1901871.
- 16 Y. Wei, H. Yang, Z.Y. Gao, *Adv. Sci.*, 2020, 7, 1903060-1903068.
- 17 X. Fan, W. Chen, S. Xin, *J. Mater. Chem. C*, 2018, 6, 2978-2982.
- 18 Y. Chen, B. Yu, J. Gou, *J. Mater. Chem. C*, 2018, 6, 10687-10692.
- 19 M.M. Jiao, L.P. Dong, Q.F. Xu, *Dalton Trans.*, 2019, 49, 667-674.
- 20 X. Geng, Y. Xie, S. Chen, *Chem. Eng. J.*, 2021, 410, 128396-128406.
- 21 R. Shi, L.X. Ning, Z.Q. Wang, *Adv. Opt. Mater.*, 2019, 7, 1901187-1901193.
- 22 S. He, F. Xu, T. Han, *Chem. Eng. J.*, 2020, 392, 123657-123667.
- 23 Q. Wei, J. Ding, Y. Wang, *Chem. Eng. J.*, 2020, 386, 124004-124023.
- 24 S. Fang, T. Lang, T. Han, *Chem. Eng. J.*, 2020, 389, 124297-124308.
- 25 S. Wang, Y. Xu, T. Chen, *Chem. Eng. J.*, 2021, 404, 125912-125938.
- 26 Y. Wei, H. Yang, Z. Gao, *Laser Photonics Rev.*, 2020, 15, 2000048-2000057.
